# Supplementary material for: The molecular picture of amplified spontaneous emission of star-shaped functionalized-truxene derivatives
Source: Royal Society of Chemistry journal article supplement (doi:10.1039/c5tc01040c), 2015-01-01
Supplement: c5tc01040c1.pdf [file c5tc01040c1.pdf]

## Supporting information

# **The molecular picture for Amplified Spontaneous Emission of star-shaped functionalized-truxene derivates**

Lin Ma<sup>#a</sup>, Zhaoxin Wu<sup>\*\*a</sup>, Guijiang Zhou<sup>\*b</sup>, Fang Yuan<sup>a</sup>, Yue Yu<sup>a</sup>, Chunliang Yao<sup>b</sup>,  
Shuya Ning<sup>a</sup>, Xun Hou<sup>a</sup>, Yu Li<sup>c</sup>, Shufeng Wang<sup>c</sup> and Qihuang Gong<sup>c</sup>

<sup>a</sup>Key Laboratory of Photonics Technology for Information, School of Electronic and  
Information Engineering, Xi'an Jiaotong University, Xi'an 710049, PR China

<sup>b</sup>Department of Chemistry, School of Science, Xi'an Jiaotong University, Xi'an 710049, PR  
China

<sup>c</sup>State Key Laboratory for Mesoscopic Physics and Department of Physics, Peking University,  
Beijing 100871, PR China

\* To whom correspondence should be addressed.

Email: zhaoxinwu@mail.xjtu.edu.cn; zhougj@mail.xjtu.edu.cn

# These authors contributed equally to this work.

## Optical gain and waveguide losses

Figure S1 shows the ASE output intensity as a function of pump stripe length at the pump intensity  $0.78 \text{ mJ/cm}^2$ . The net gain coefficients were found to be as high as  $19 \text{ cm}^{-1}$  for Tr1 and  $32 \text{ cm}^{-1}$  for Tr2. If instead of changing the length of the stripe we vary the distance between the stripe and the edge of the film, the output intensity  $I_{out}$  is given by  $I_{out} = I_0 \exp(-\alpha x)$ , where  $\alpha$  is the optical loss coefficient and  $x$  is the distance from the end of the stripe to the edge of the film. The results of optical loss measurements are shown in Figure S1(b). In the semi-log graph, the slope of the lines corresponds to loss coefficients of  $3.4 \text{ cm}^{-1}$  for Tr1 and  $3.2 \text{ cm}^{-1}$  for Tr2, relatively low value compared to other star-shaped organic emitters.<sup>[1]</sup>

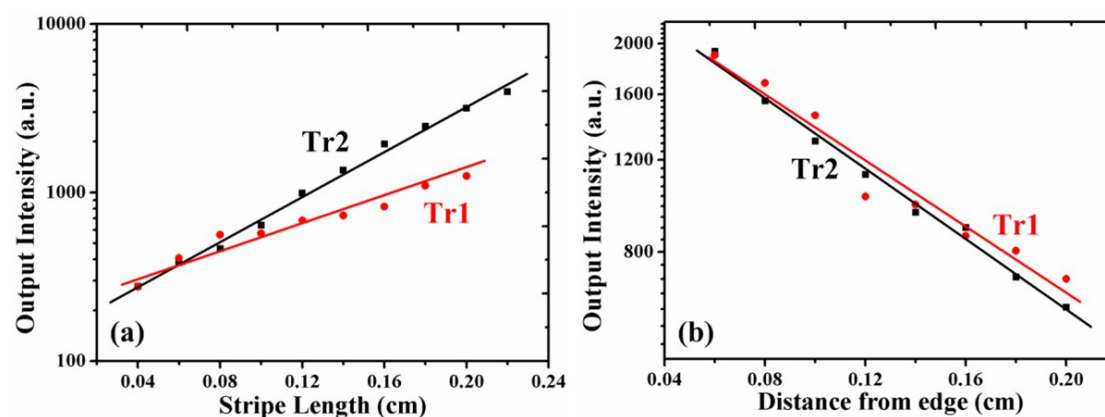

**Figure S1** ASE measurements on the Tr1 and Tr2 showing (a) optical gain measurements and (b) waveguide losses. The pump intensity is  $0.78 \text{ mJ/cm}^2$  which is above the ASE thresholds of the compounds.

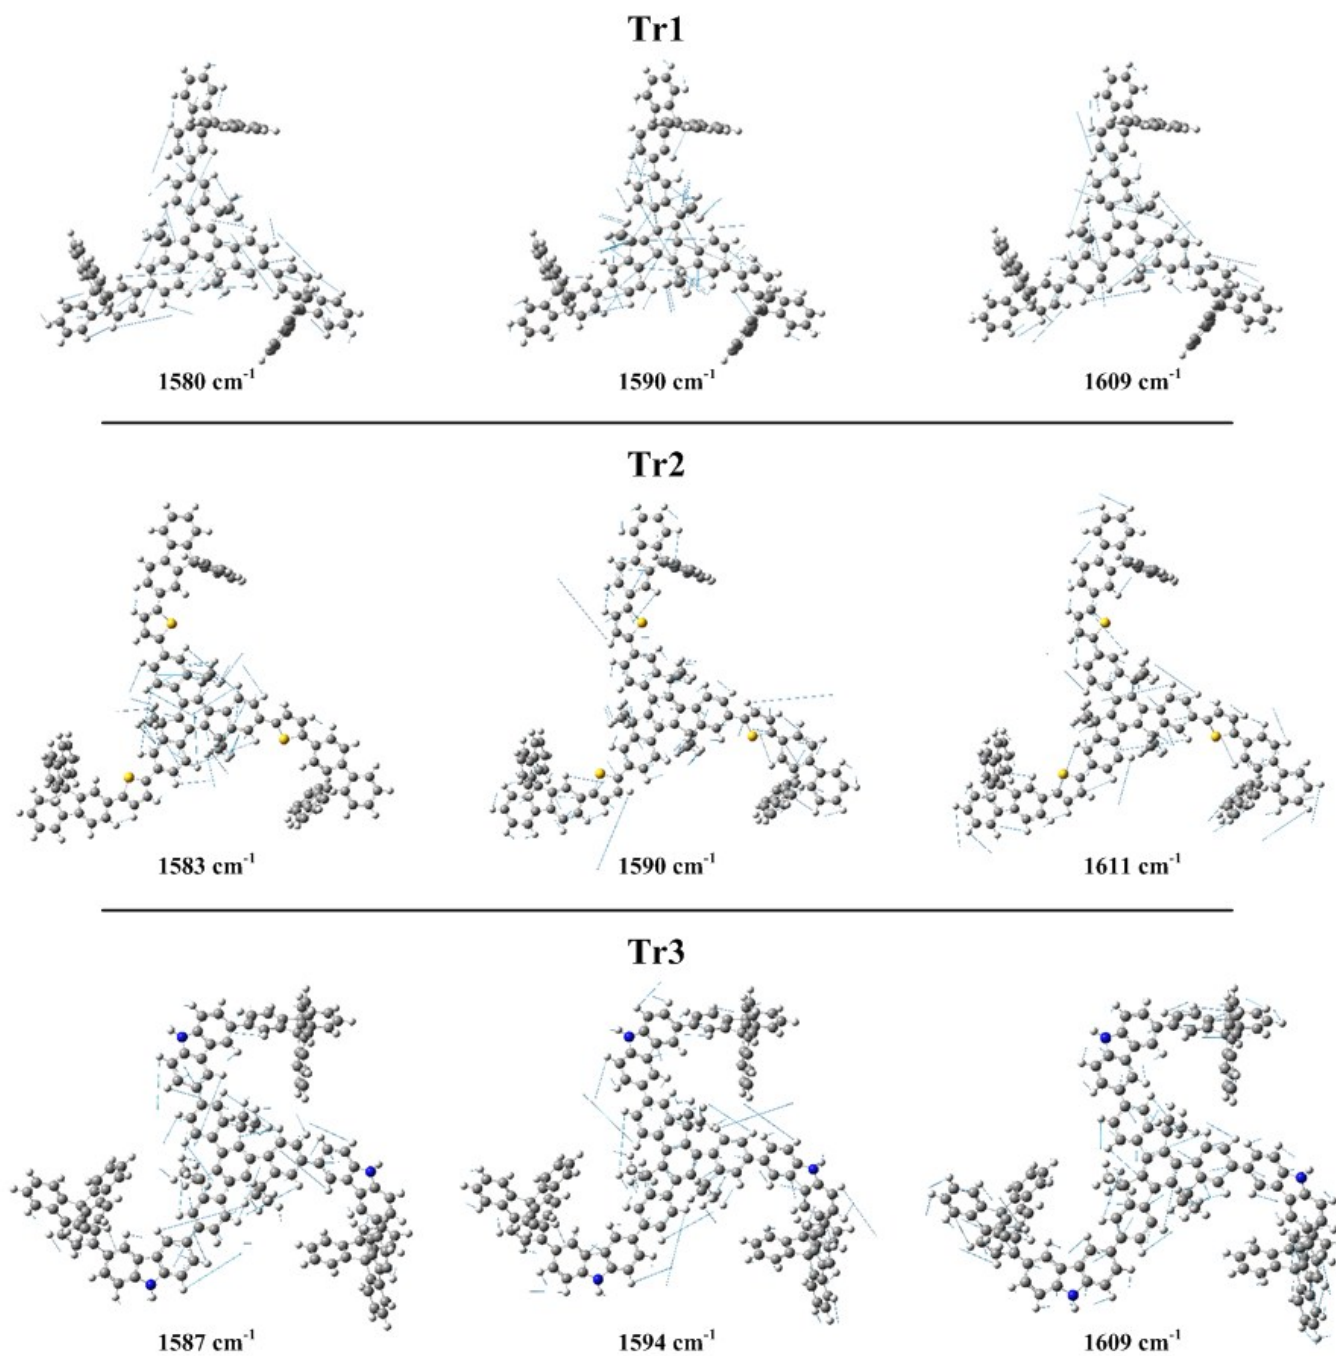

**Figure S2** Calculated vibrational eigenvectors of some high-frequency modes. The contribution of each mode to the total deformation of samples is enlarged by the same factor.

**Table SI** Selected normal modes and relevant parameters of Tr1, Tr2 and Tr3.

Selected vibrational frequencies ( $\hbar\omega_j$ ), Huang-Rhys factors ( $S_j$ ) and reorganization energies ( $\lambda_j$ ) of the ground state of compound Tr1.

|                     | $\hbar\omega_j$<br>( $\text{cm}^{-1}$ ) | $S_j$     | $\lambda_j$<br>( $\text{cm}^{-1}$ ) |
|---------------------|-----------------------------------------|-----------|-------------------------------------|
| Low-frequency Modes | 27                                      | 0.488072  | 13.3                                |
|                     | 136                                     | 0.4811805 | 65.3                                |

---

|                      |           |           |       |
|----------------------|-----------|-----------|-------|
| 137                  | 0.4598405 | 62.9      |       |
| 138                  | 0.2132045 | 29.4      |       |
| 155                  | 0.346112  | 53.9      |       |
| 167                  | 0.4232    | 70.6      |       |
| 172                  | 0.293378  | 50.5      |       |
| 207                  | 0.2865245 | 59.4      |       |
| 208                  | 1.131008  | 235.7     |       |
| 222                  | 0.553352  | 122.8     |       |
| 225                  | 0.3570125 | 80.4      |       |
| 232                  | 0.2003445 | 46.5      |       |
| 275                  | 1.2121245 | 332.8     |       |
| 276                  | 1.3861125 | 381.5     |       |
| 278                  | 0.9261605 | 257.6     |       |
| 284                  | 1.0731125 | 304.6     |       |
| 349                  | 0.2972205 | 103.8     |       |
| 350                  | 0.3096845 | 108.4     |       |
| 365                  | 0.294912  | 107.9     |       |
| 437                  | 0.3898445 | 170       |       |
| 439                  | 0.492032  | 215.7     |       |
| 439                  | 0.245     | 107.5     |       |
| 490                  | 0.4608    | 225.6     |       |
| 507                  | 0.4636845 | 234.7     |       |
| 508                  | 0.32805   | 166.6     |       |
| 644                  | 0.213858  | 137.1     |       |
| 715                  | 0.209952  | 150.2     |       |
| 722                  | 0.8911125 | 643.7     |       |
| 724                  | 0.5408    | 391.8     |       |
| 741                  | 0.4522005 | 334.8     |       |
| 742                  | 0.390728  | 289.8     |       |
| 782                  | 0.272322  | 212.6     |       |
| 785                  | 0.2987645 | 234.9     |       |
| 835                  | 0.3112605 | 259.8     |       |
| 838                  | 0.2028845 | 169.9     |       |
| 841                  | 0.6061005 | 509.6     |       |
| 871                  | 0.2686445 | 233.8     |       |
| 874                  | 0.2211125 | 193       |       |
| 879                  | 0.21125   | 185.9     |       |
| 889                  | 0.249218  | 221.5     |       |
| 1167                 | 0.376712  | 439.3     |       |
| 1299                 | 0.118098  | 153.2     |       |
| High-frequency Modes | 1580      | 0.1305605 | 206.2 |
|                      | 1590      | 0.07605   | 120.8 |
|                      | 1609      | 0.019217  | 30..9 |

---

Selected vibrational frequencies ( $\hbar\omega_j$ ), Huang-Rhys factors ( $S_j$ ) and reorganization energies ( $\lambda_j$ ) of the ground state of compound Tr2.

|                      | $\hbar\omega_j$<br>(cm <sup>-1</sup> ) | $S_j$     | $\lambda_j$<br>(cm <sup>-1</sup> ) |
|----------------------|----------------------------------------|-----------|------------------------------------|
|                      | 4                                      | 0.88445   | 3.5                                |
|                      | 6                                      | 0.69974   | 3.9                                |
|                      | 8                                      | 2.31289   | 18.5                               |
|                      | 11                                     | 1.3300805 | 14.6                               |
|                      | 13                                     | 0.581042  | 7.6                                |
|                      | 14                                     | 0.2443005 | 3.3                                |
|                      | 21                                     | 0.2686445 | 5.6                                |
|                      | 26                                     | 0.3638045 | 9.7                                |
|                      | 45                                     | 1.0039445 | 44.8                               |
|                      | 48                                     | 2.455328  | 118.4                              |
|                      | 49                                     | 1.6562    | 80.5                               |
|                      | 50                                     | 0.753992  | 37.9                               |
|                      | 58                                     | 0.5951405 | 34.4                               |
|                      | 59                                     | 0.647522  | 38                                 |
| Low-frequency Modes  | 127                                    | 0.2820005 | 35.7                               |
|                      | 129                                    | 0.4772645 | 61.4                               |
|                      | 131                                    | 0.8515125 | 111.1                              |
|                      | 132                                    | 1.1873405 | 156.6                              |
|                      | 134                                    | 0.919368  | 123.1                              |
|                      | 137                                    | 1.6909605 | 231.1                              |
|                      | 140                                    | 0.5995125 | 84.2                               |
|                      | 155                                    | 0.5171445 | 80.2                               |
|                      | 157                                    | 1.8605205 | 292.2                              |
|                      | 165                                    | 0.3192005 | 52.7                               |
|                      | 169                                    | 0.445568  | 75.1                               |
|                      | 179                                    | 0.31205   | 55.9                               |
|                      | 201                                    | 0.2820005 | 56.7                               |
|                      | 385                                    | 0.2527605 | 97.5                               |
|                      | 387                                    | 0.240818  | 93.1                               |
|                      | 1168                                   | 0.1990125 | 231.8                              |
|                      | 1302                                   | 0.1417605 | 184.5                              |
| High-frequency Modes | 1583                                   | 0.359552  | 564.9                              |
|                      | 1590                                   | 0.082205  | 127.2                              |
|                      | 1611                                   | 0.01283   | 20.8                               |

Selected vibrational frequencies ( $\hbar\omega_j$ ), Huang-Rhys factors ( $S_j$ ) and reorganization energies ( $\lambda_j$ ) of the ground state of compound Tr3.

|                     | $\hbar\omega_j$<br>(cm <sup>-1</sup> ) | $S_j$     | $\omega_j$<br>(cm <sup>-1</sup> ) |
|---------------------|----------------------------------------|-----------|-----------------------------------|
|                     | 7                                      | 0.96605   | 6.7                               |
|                     | 8                                      | 0.8129845 | 6.6                               |
|                     | 9                                      | 0.21424   | 1.8                               |
|                     | 49                                     | 0.591872  | 29.1                              |
|                     | 51                                     | 0.334562  | 17.2                              |
|                     | 54                                     | 0.739328  | 39.7                              |
|                     | 54                                     | 0.741762  | 40.3                              |
|                     | 56                                     | 0.22445   | 12.6                              |
|                     | 59                                     | 0.2642645 | 15.6                              |
|                     | 67                                     | 0.202248  | 13.5                              |
|                     | 112                                    | 0.326432  | 36.7                              |
|                     | 120                                    | 0.3049805 | 36.5                              |
|                     | 124                                    | 0.32805   | 40.5                              |
|                     | 132                                    | 0.406802  | 53.5                              |
|                     | 136                                    | 0.8857805 | 120.9                             |
|                     | 157                                    | 0.8725205 | 137.4                             |
|                     | 195                                    | 0.445568  | 347.7                             |
|                     | 197                                    | 1.7653205 | 52.7                              |
|                     | 214                                    | 0.246402  | 57.9                              |
|                     | 270                                    | 0.2145125 | 227.9                             |
| Low-frequency Modes | 281                                    | 0.8102645 | 88.4                              |
|                     | 296                                    | 0.2987645 | 409.7                             |
|                     | 300                                    | 1.367858  | 119.7                             |
|                     | 315                                    | 0.380192  | 115.4                             |
|                     | 322                                    | 0.357858  | 185.5                             |
|                     | 385                                    | 0.482162  | 99.3                              |
|                     | 472                                    | 0.209952  | 101.5                             |
|                     | 477                                    | 0.212552  | 202.3                             |
|                     | 492                                    | 0.4113245 | 151.7                             |
|                     | 494                                    | 0.3065445 | 139.9                             |
|                     | 516                                    | 0.2715845 | 147.7                             |
|                     | 519                                    | 0.284258  | 118.4                             |
|                     | 525                                    | 0.225792  | 134.2                             |
|                     | 561                                    | 0.239432  | 550.5                             |
|                     | 580                                    | 0.9480645 | 259.2                             |
|                     | 619                                    | 0.4186125 | 139.9                             |
|                     | 654                                    | 1.9110125 | 1248.4                            |
|                     | 657                                    | 0.2926125 | 223.9                             |
|                     | 704                                    | 0.3176045 | 248                               |
|                     | 712                                    | 0.3486125 | 548.6                             |
|                     | 727                                    | 0.7552205 | 276                               |
|                     | 742                                    | 0.371522  | 119.3                             |

|                      |      |           |       |
|----------------------|------|-----------|-------|
|                      | 907  | 0.239432  | 217   |
|                      | 1166 | 0.313632  | 365.4 |
|                      | 1299 | 0.152488  | 198   |
| High-frequency Modes | 1587 | 0.1529045 | 240.8 |
|                      | 1594 | 0.024537  | 39.1  |
|                      | 1609 | 0.0321805 | 51.5  |

### Theoretical model: Elongation of vibrational modes

Under the adiabatic approximation, the electronic ground and excited state wave functions can be expressed as products of an electronic and nuclear part. Assuming a single vibronic coordinate for simplicity, the vibronic part of the total wave function contributes only a Frank-Condon overlap factors. The probability to emit through a transition from the lowest vibronic level  $|0_e\rangle$  of the first excited-state vibronic to the electronic ground state vibronic level  $|n_g\rangle$  with an electric field  $E$  at energy  $E_L$  is given by Fermi's golden rule: [2]

$$P(|0_e\rangle \rightarrow |n_g\rangle) = \frac{2\pi}{\hbar} |E \cdot \mu|^2 |\langle 0_e | n_g \rangle|^2 \times \delta(E_L + E_{HOMO} - E_{LUMO} - n_g \hbar \omega) \quad (1)$$

where  $\mu$  is the electronic transition dipole and the Franck-Condon factor can be defined as Poisson distribution:

$$|\langle 0_e | n_g \rangle|^2 = \frac{S^n}{n!} e^{-S} \quad (2)$$

In the Poisson distribution over the vibronic levels,  $S$  is Huang-Rhys factor which represents the vibronic coupling strength:

$$S_j = \frac{\omega(\Delta Q_j)^2}{2\hbar} \quad (3)$$

where  $\Delta Q_j$  represents the displacement along the normal mode  $(NM)_j$  between the equilibrium positions of the two electronic states.

## References:

- [1] Y. Wang, G. Tsiminis, Y. Yang, A. Ruseckas, A. L. Kanibolotsky, I. F. Perepichka, P. J. Skabara, G. A. Turnbull, I. D. W. Samuel, *Synth. Met.* **2010**, *160*, 1397.
- [2] I. Vragovic, R. Scholz, M. Schreiber, *Euro. Phys. Lett.* **2002**, *57*, 288-294.
